# Supplementary material
Source: PubMed Central journal article supplement (PMC1479593)

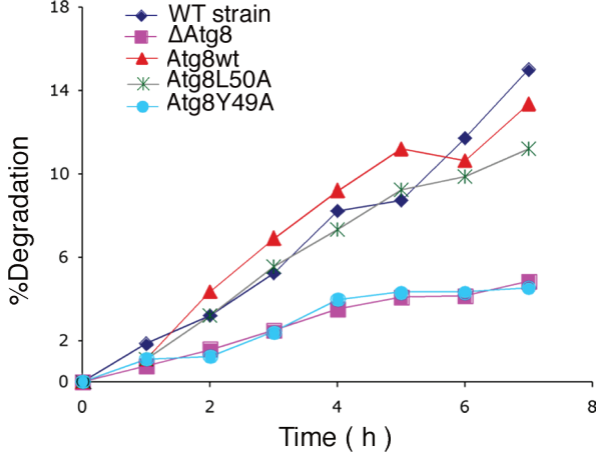

Fig .1 Supplementary

Supplement: 7400698-s1.pdf [file 7400698-s1.pdf]
